# Supplementary material for: Melatonin ameliorates hypoglycemic stress‐induced brain endothelial tight junction injury by inhibiting protein nitration of TP53‐induced glycolysis and apoptosis regulator
Source: PubMed Central journal article supplement — J Pineal Res. 2017 Sep 6;63(4):e12440. doi: 10.1111/jpi.12440 (PMC5656838; doi:10.1111/jpi.12440), 2017-09-06
Supplement: JPI-63-na-s001.pdf [file JPI-63-na-s001.pdf]

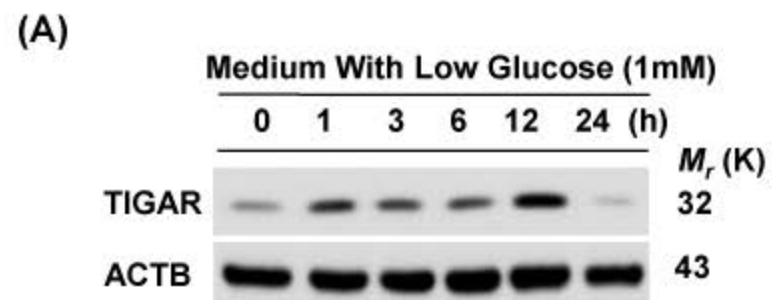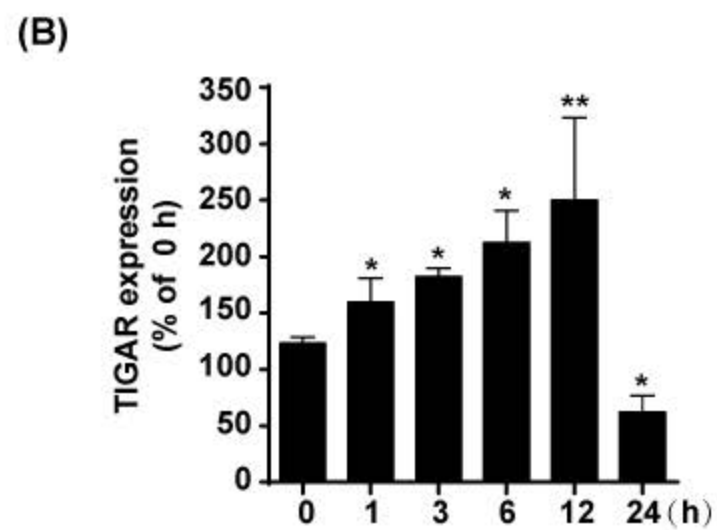

Supplementary Figure 1

(A)

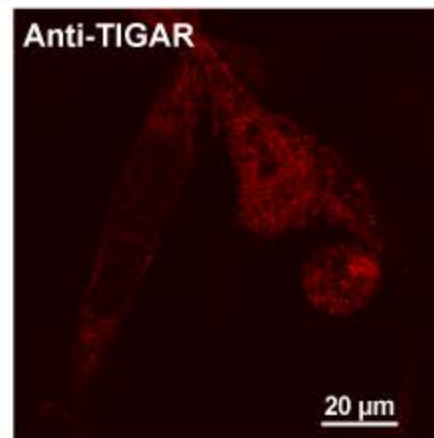

(B)

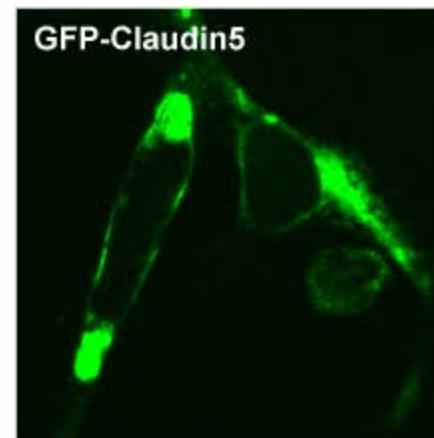

(C)

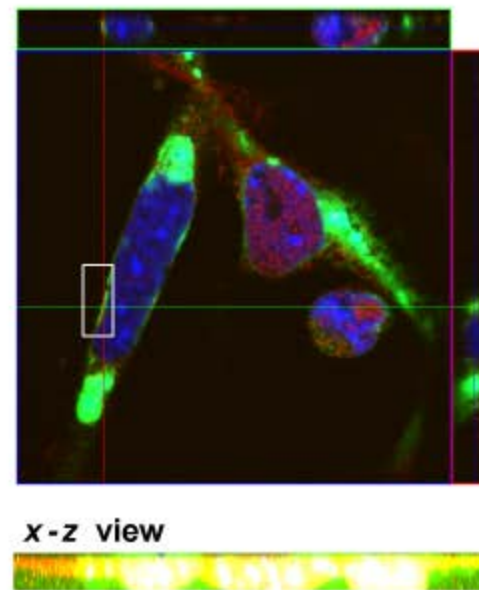

(D)

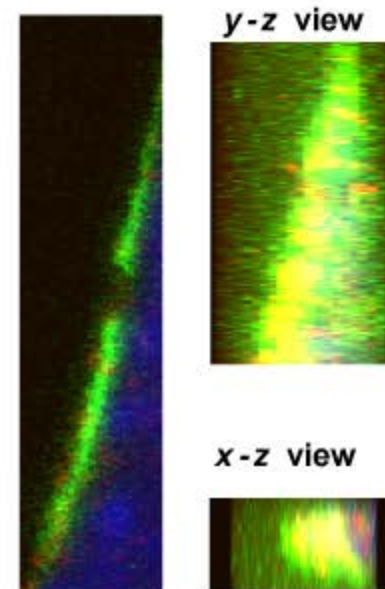

Supplementary Figure 2

(A)

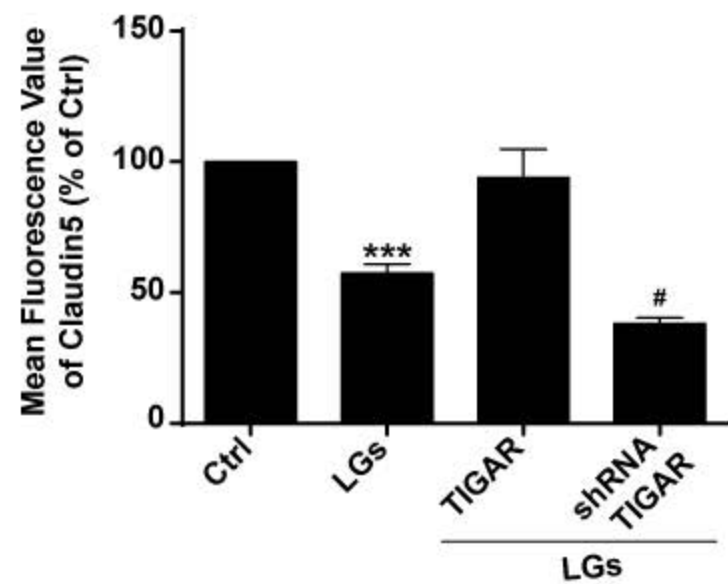

(B)

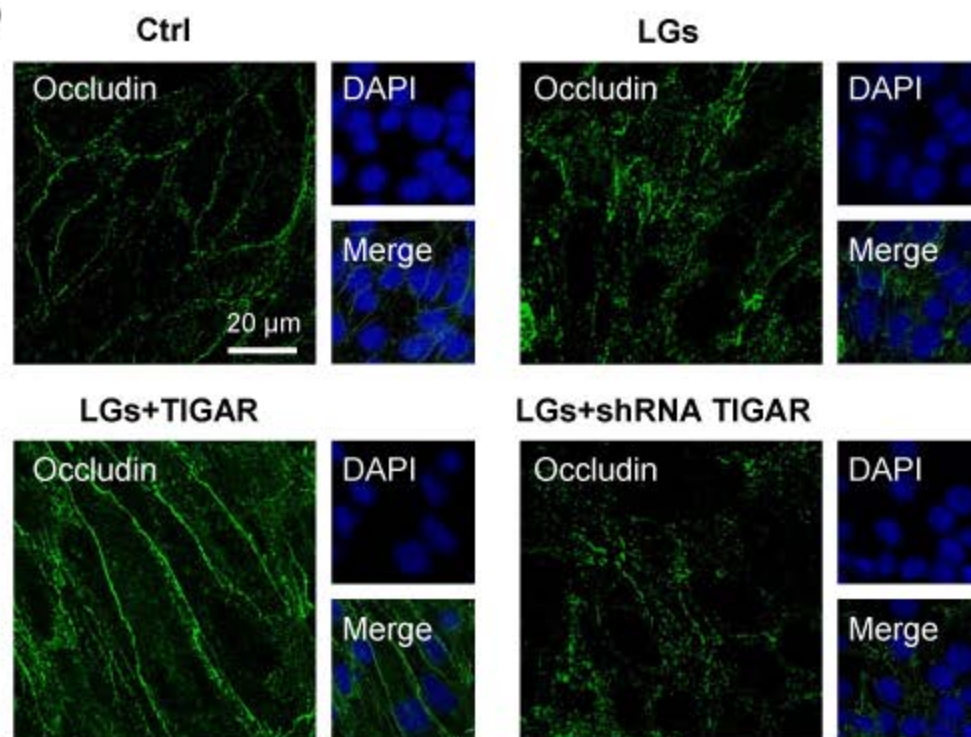

Supplementary Figure 3

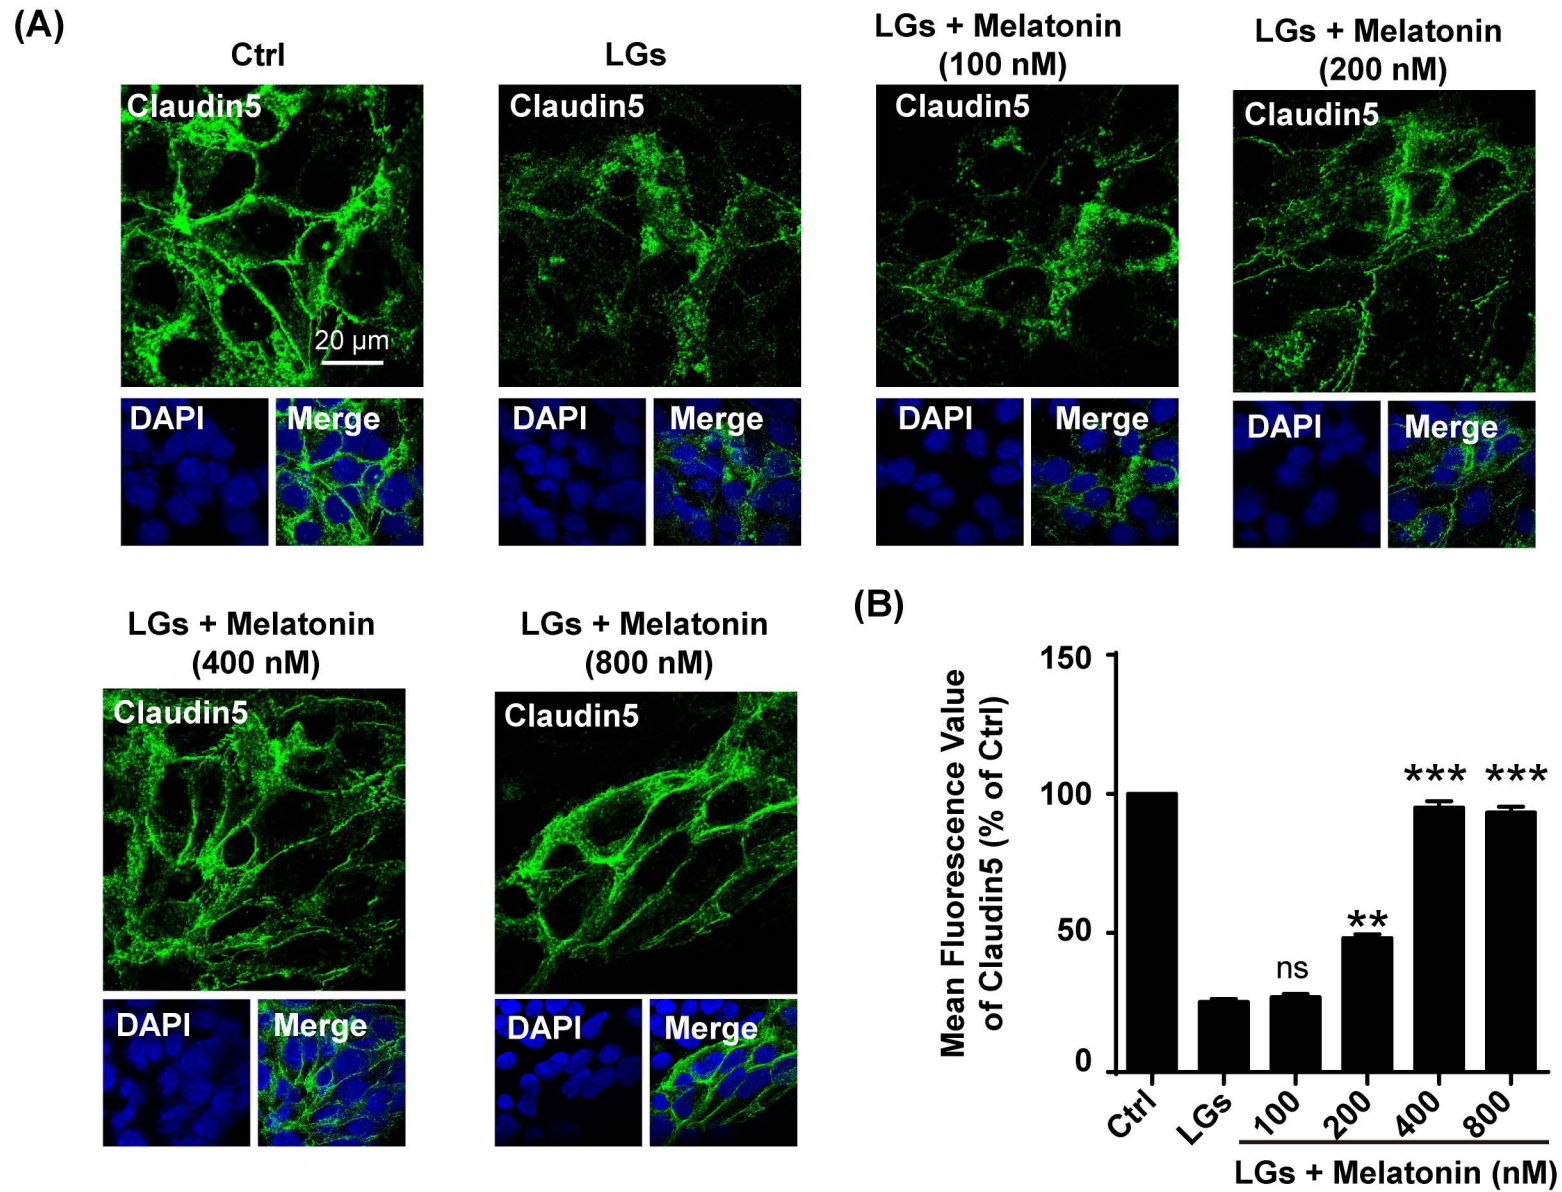

Supplementary Figure 4

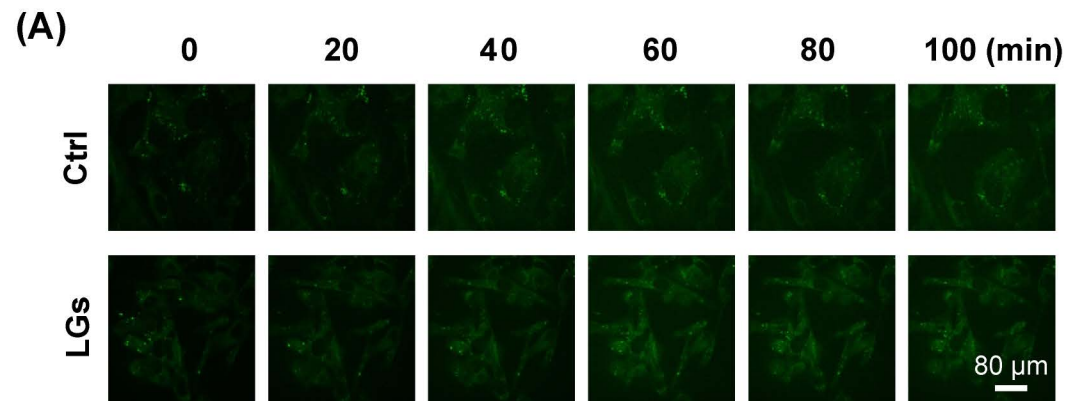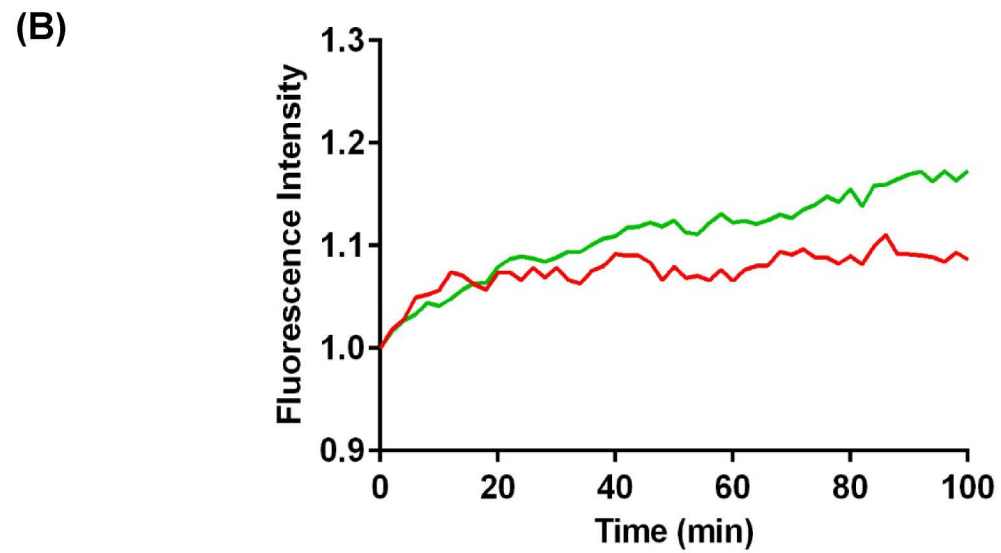

Supplementary Figure 5

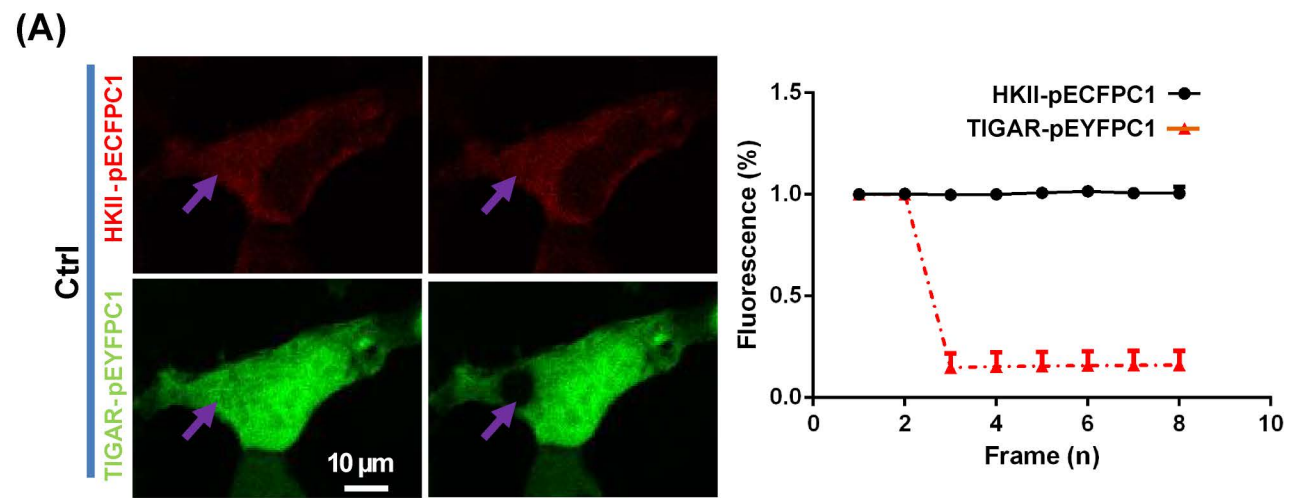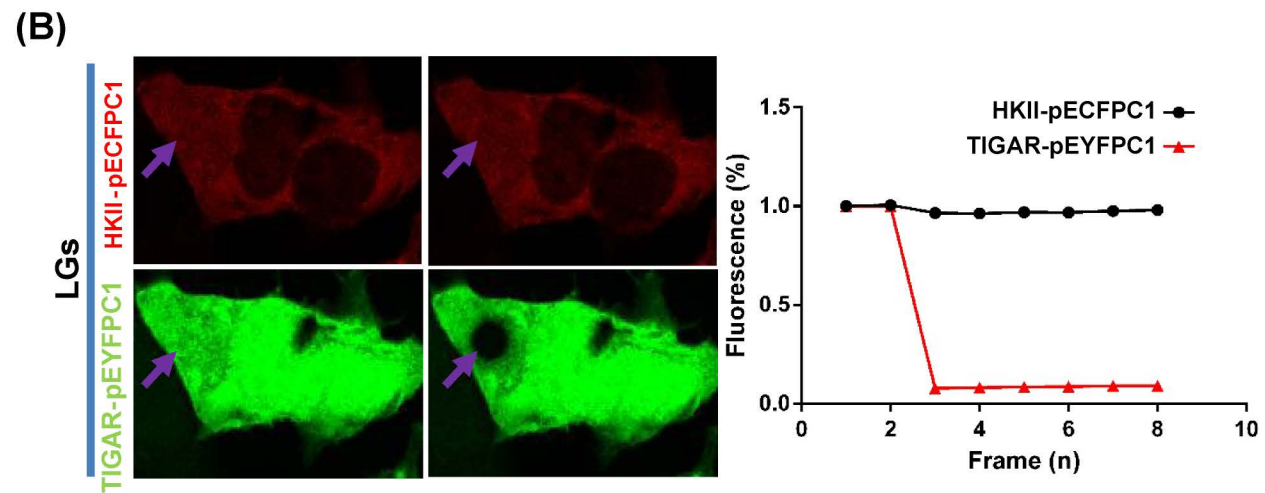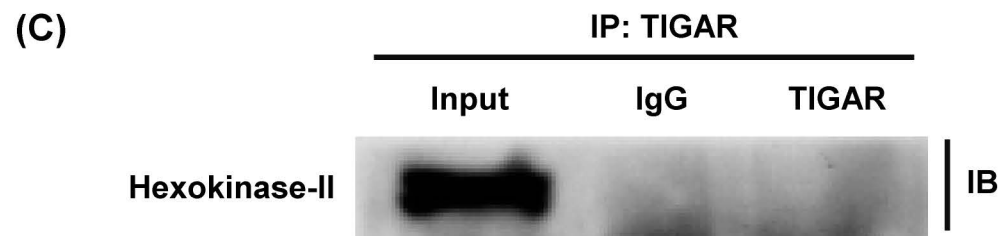

Supplementary Figure 6

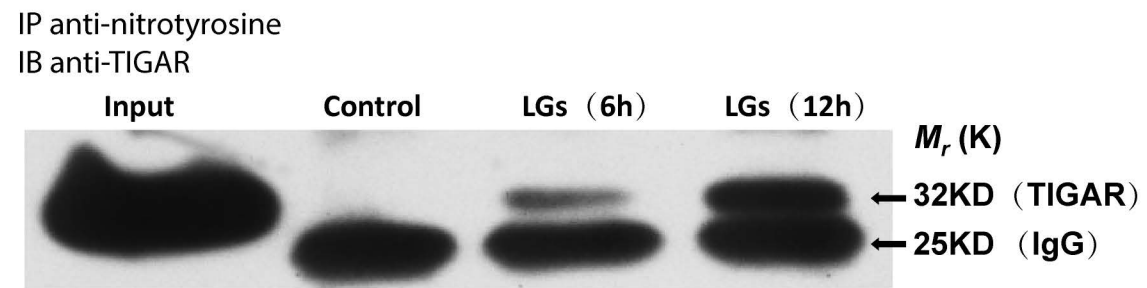

**Supplementary Figure 7**

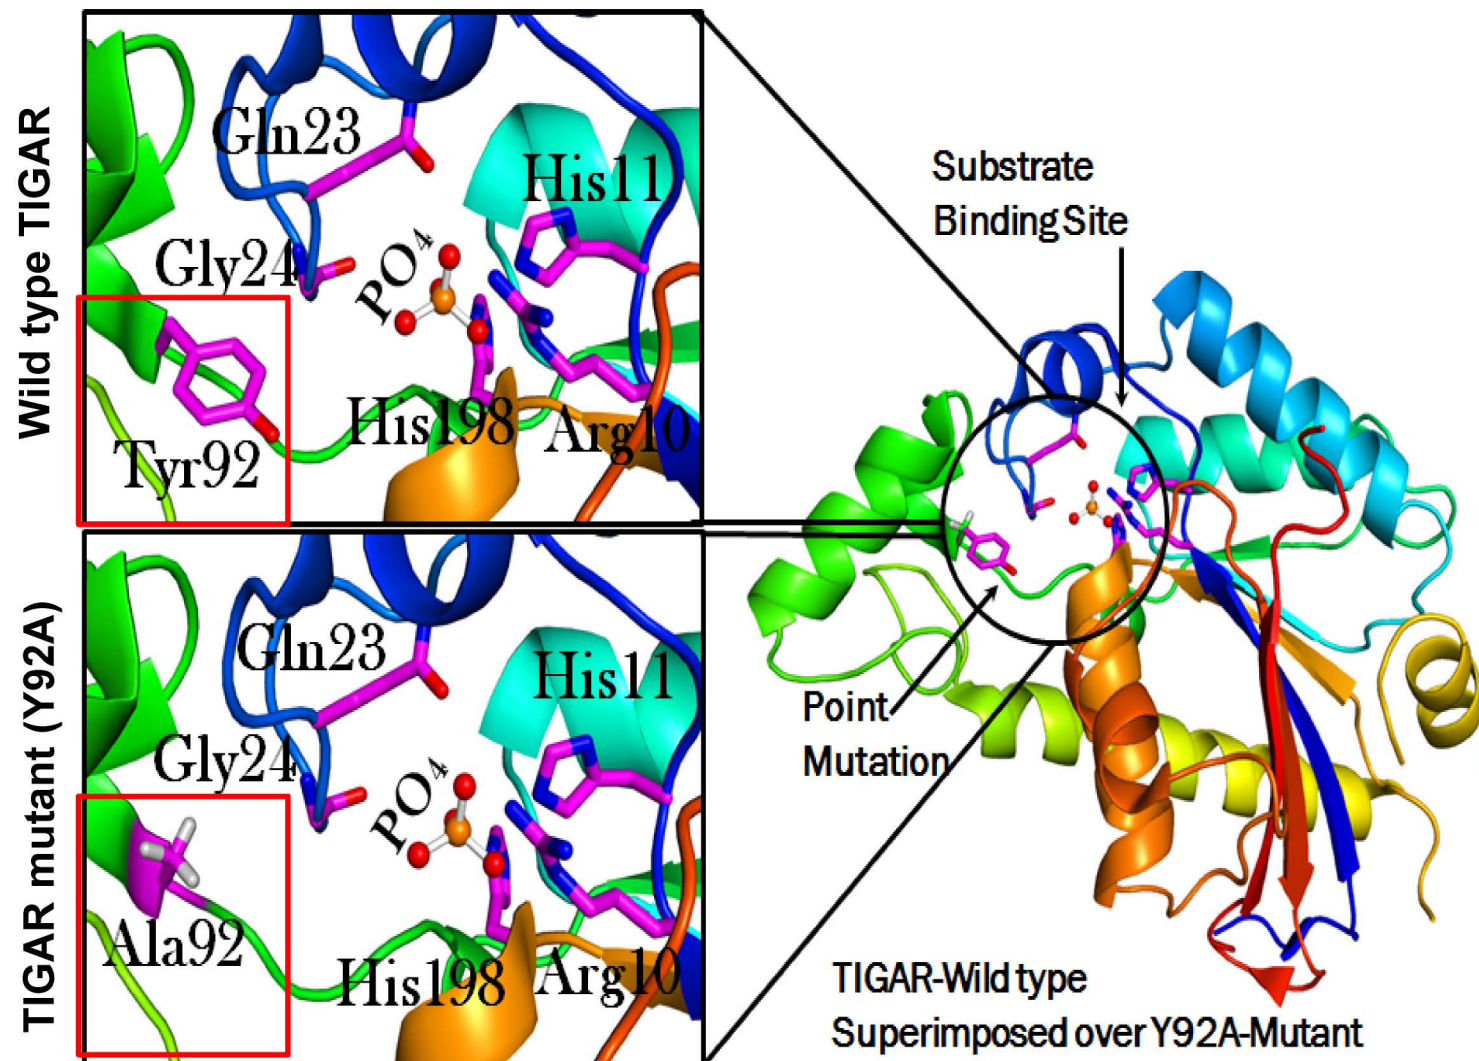

X-Ray crystal structure of TIGAR (PDB entry: 3DCY)

Supplementary Figure 8



(A)

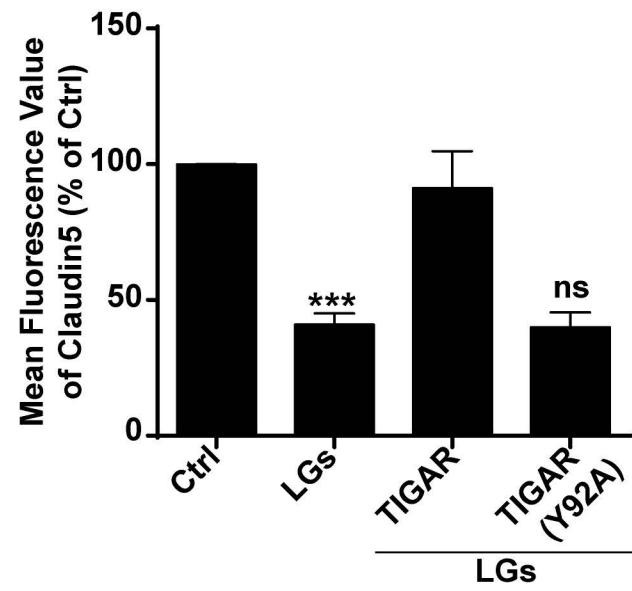

(B)

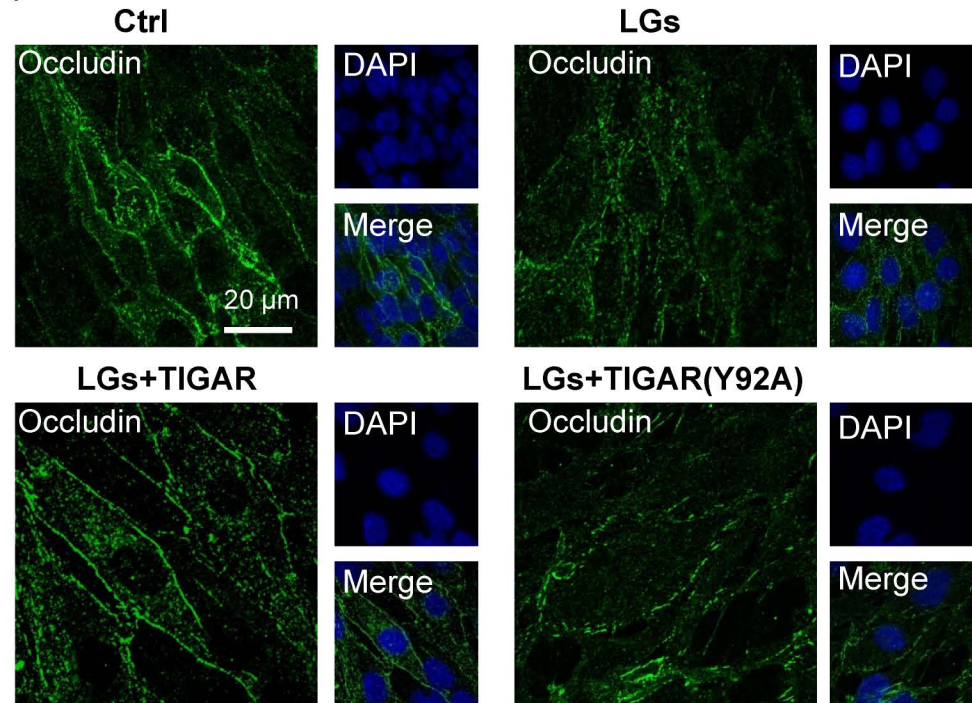

Supplementary Figure 9

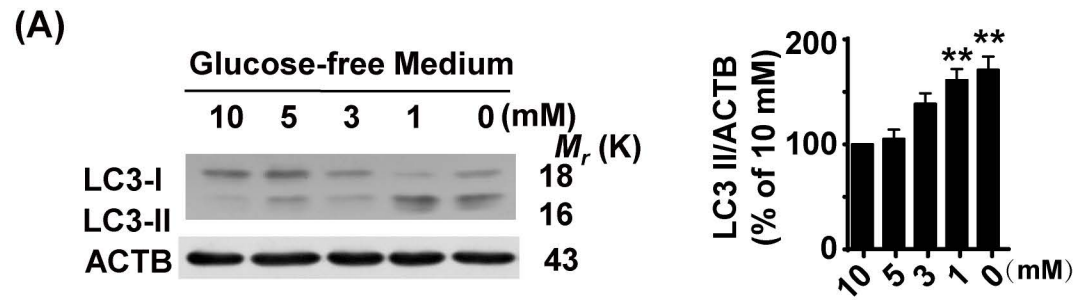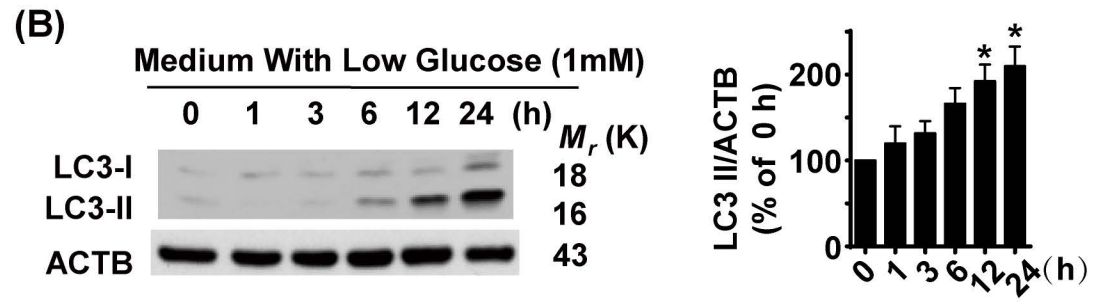

Supplementary Figure 10

(A)

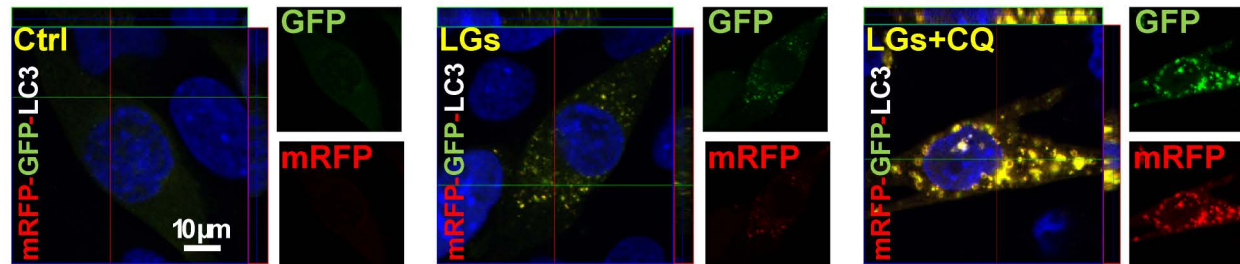

(B)

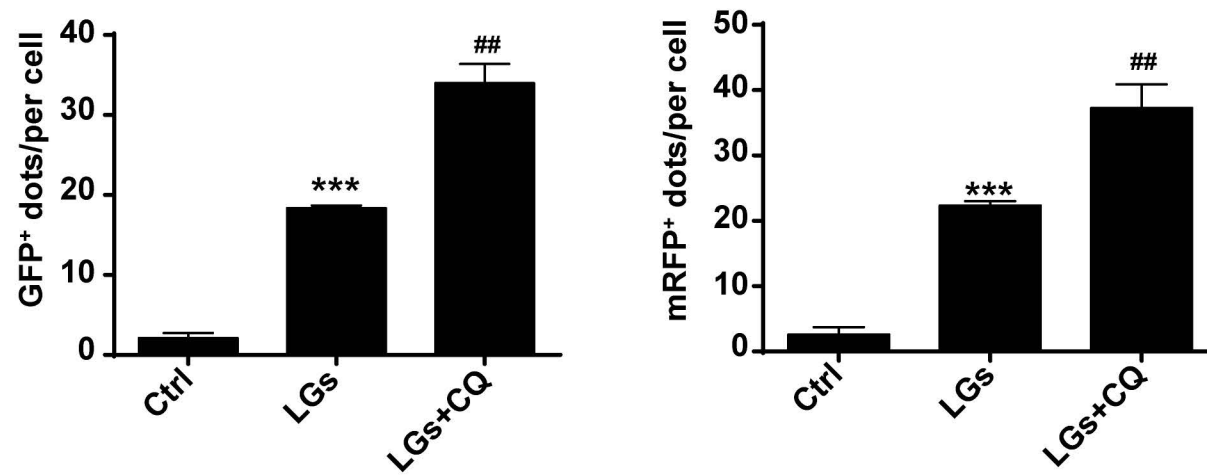

Supplementary Figure 11

(A)

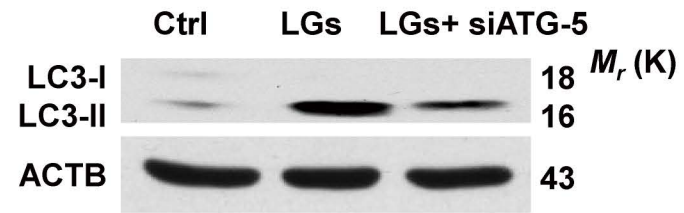

(B)

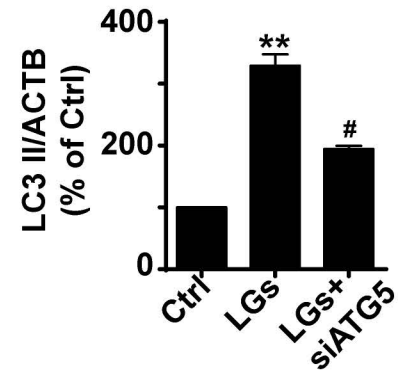

Supplementary Figure 12

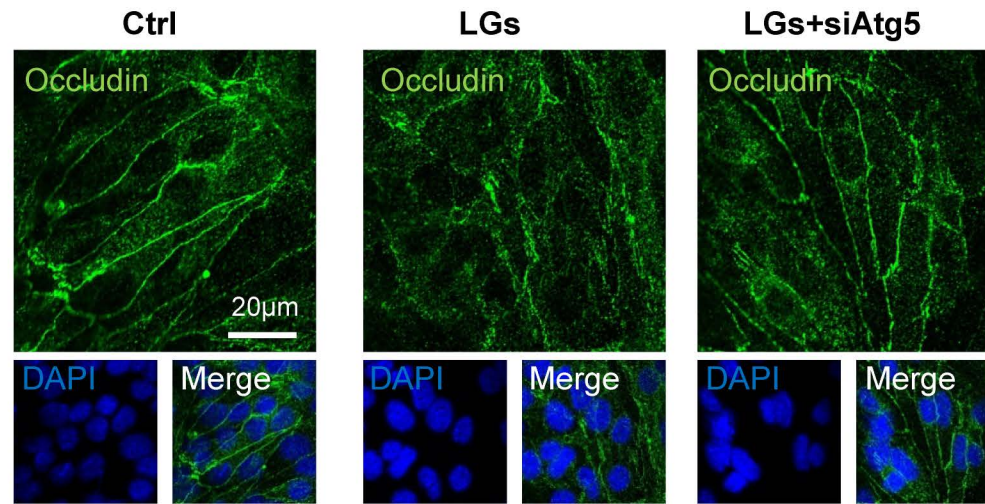

**Supplementary Figure 13**
